# Supplementary material for: The Words of Affectivity. Affect, Category, and Social Evaluation Norms for 400 Polish Adjectives
Source: Front Psychol. 2021 Sep 8;12:683012. doi: 10.3389/fpsyg.2021.683012 (PMC8455918; doi:10.3389/fpsyg.2021.683012)
Supplement: Supplementary Table 1 — List of 400 adjectives and their ratings on valence, arousal, category, and social judgments dimensions alongside linguistic (frequency and word length) measures. [file Table_1.xlsx]

## Sheet: all
Polish word	English translation	subtlex_pl frequency	Kazojć (2011) frequency	Number of Letters	Valence_Mean	Valence_SD	Arousal_Mean	Arousal_SD	TS_Mean	TS_SD	CM_Mean	CM_SD
afektowany	mincing	9	42	10	4.85417	1.33671	4.8125	1.92029	2.1875	0.789728	1.97917	0.785225
agresywny	aggresive	635	247	9	2	1.50177	7.70833	1.51529	1.89583	0.515281	2.27083	0.643778
aktywny	active	456	251	7	7.52083	1.4585	6.0625	2.32842	1.83333	0.519137	1.52083	0.545371
ambitny	ambitious	337	397	7	7.94118	1.08465	6.62745	1.9795	1.17647	0.385013	1.45098	0.576671
apatyczny	listless	23	74	9	3.375	1.49645	3.125	1.99601	2.02083	0.56454	1.8125	0.641018
arogancki	arrogant	567	272	9	2.27083	1.00508	6.375	1.86371	1.29167	0.45934	2.45833	0.617419
bezbronny	defensless	240	637	9	2.47917	1.41406	6.6875	2.07473	1.52083	0.545371	2.47917	0.618495
bezczelny	insolent	434	455	9	2.95833	1.51529	4.52083	2.18301	2.5625	0.580031	1.91667	0.738985
bezduszny	soulless	102	82	9	1.84314	1.00742	6.88235	2.0263	1.56863	0.608437	2.56863	0.538699
bezlitosny	merciless	217	352	10	1.70833	1.07106	6.22917	2.18544	1.20833	0.410414	2.70833	0.54415
bezmyślny	idle	121	152	9	2.16667	1.34217	4.10417	2.3269	1.58333	0.57735	1.5	0.58346
bezsilny	impotent	249	538	8	2.33333	1.10755	5.19608	2.51412	2.4902	0.612292	1.45098	0.610368
beztroski	carefree	175	468	9	5.5	1.23771	5.20833	1.84458	1.77083	0.627036	2.08333	0.646869
bezwolny	supine	4	78	8	2.66667	1.24342	4.5	2.30633	2.08333	0.738985	2.08333	0.678965
bezwstydny	shameless	66	105	10	2.79167	1.45804	5.25	2.33839	1.20833	0.410414	2.72917	0.535529
bezwzględny	ruthless	208	366	11	3.33333	1.77388	6.4902	1.86947	1.45098	0.502543	2.33333	0.553775
błyskotliwy	brilliant	219	253	11	7.9375	1.11863	6.47917	1.70093	1.33333	0.55862	1.16667	0.376622
bojaźliwy	timid	33	83	9	3.41667	1.4267	5.1875	1.95324	1.375	0.63998	1.89583	0.750591
brutalny	brutal	579	441	8	1.77083	1.03635	6.95833	1.90138	1.52083	0.58308	2.58333	0.57735
chaotyczny	chaotic	46	149	10	3.52941	1.27048	5.96078	1.92832	1.66667	0.588784	1.4902	0.644129
chełpliwy	boastful	2	34	9	3.10417	1.35646	5.0625	1.71856	1.35417	0.525502	2.16667	0.807764
chmurny	dreary	4	220	7	3.5	1.05185	4.04167	1.84458	2.375	0.732963	2.1875	0.841889
chwiejny	unstable	42	148	8	3.10417	0.994444	4.0625	1.89519	1.85417	0.683843	2	0.652328
ciekawski	nosey	152	112	9	4.88235	2.0557	5.62745	1.90747	1.35294	0.48264	1.96078	0.720022
cierpiący	suffering	95	274	9	1.6875	0.926128	6.08333	2.06112	2.79167	0.410414	2.4375	0.711793
cierpliwy	patient	693	499	9	7.875	0.936835	4.5625	1.82076	1.3125	0.468417	1.91667	0.53924
cnotliwy	virtous	30	84	8	6.16667	1.77852	3.91667	2.18148	1.125	0.392754	2.6875	0.511828
cyniczny	cynical	171	257	8	3.52941	1.64138	5.62745	1.9795	1.29412	0.460179	2.4902	0.612292
czarujący	charming	695	444	9	7.10417	1.44752	6.35417	1.52273	1.5625	0.615621	1.85417	0.824868
czuwający	wakeful	4	132	9	6.64583	1.36038	4.58333	1.87745	2.60417	0.535529	1.64583	0.729021
denerwujący	annoying	115	111	11	2.08333	1.39655	6.04167	2.33346	1.72917	0.67602	2.20833	0.742576
despotyczny	despotic	20	42	11	1.84314	0.902719	6.4902	2.12012	1.15686	0.36729	2.31373	0.647771
dobroduszny	kind-hearted	45	239	11	7.66667	1.26042	5.27083	1.93225	1.29167	0.503534	2.64583	0.483321
dobrotliwy	bland	29	188	10	7.41667	1.19988	4.66667	1.87178	1.25	0.483779	2.72917	0.494204
dociekliwy	inquisitive	61	120	10	6.4375	1.59662	4.91667	1.94426	1.45833	0.581939	1.64583	0.699227
dojrzały	mature	372	483	8	7.64706	1.62263	5.31373	1.76057	1.41176	0.605854	1.80392	0.44809
domyślny	quick-witted	15	63	8	6.85417	1.35253	4.39583	2.08071	1.375	0.605823	1.3125	0.551834
dowcipny	witty	188	329	8	7.52083	1.14835	6.1875	1.59329	1.33333	0.519137	1.60417	0.643778
drażliwy	irritable	189	208	8	3.08333	1.35007	5.4375	2.07217	1.79167	0.713348	2.16667	0.78098
drobiazgowy	punctilious	56	81	11	4.84314	1.40531	4.39216	1.92954	1.09804	0.300327	1.56863	0.670967
dynamiczny	dynamic	72	88	10	6.77083	1.13437	6.97917	2.08836	1.72917	0.535529	1.47917	0.683843
dyskretny	unobtrusive	219	346	9	7.5	1.16692	4.70833	1.99956	1.3125	0.511828	2.1875	0.606919
dziarski	spry	32	127	8	6.70833	1.62374	5.95833	2.06241	1.47917	0.58308	1.875	0.703336
egoistyczny	egoistic	93	64	11	2.41176	1.66345	6.17647	1.94634	1.29412	0.501762	2.62745	0.598691
egzaltowany	exalted	2	37	11	4.58333	1.36574	4.89583	2.05498	1.91667	0.767237	1.89583	0.691578
elokwentny	eloquent	58	54	10	7.8125	1.21439	5.41667	1.83156	1.20833	0.45934	1.1875	0.394443
emocjonalny	emotional	315	209	11	5.33333	1.32622	6.25	1.89624	1.5625	0.54211	2.41667	0.646869
energiczny	energetic	76	377	10	7.45098	1.00625	6.98039	1.65518	1.70588	0.57599	1.29412	0.501762
figlarny	whimsical	23	82	8	5.72917	1.4694	6.39583	1.84206	1.66667	0.663111	2.25	0.812142
gadatliwy	gabby	114	215	9	5.10417	1.49096	5.89583	1.9487	1.5	0.505291	1.5625	0.615621
gburowaty	grumpy	36	95	9	1.83333	1.01758	4.0625	2.29158	1.47917	0.58308	2.1875	0.816225
gderliwy	garrulous	14	49	8	2.58824	1.29887	5.33333	2.19697	1.41176	0.605854	1.82353	0.740429
gniewny	cross	67	546	7	2.5625	1.47181	6.41667	2.02992	1.75	0.729325	2.3125	0.719227
gorliwy	zealous	60	161	7	6	1.51587	5.375	2.01721	1.35417	0.483321	1.75	0.635811
gościnny	hospitable	323	277	8	7.9375	1.1743	4.66667	2.3094	1.20833	0.410414	2.27083	0.706793
grubiański	coarse	50	68	10	2.19608	1.21687	5.80392	2.20925	1.23529	0.428403	2.45098	0.610368
gruboskórny	thick-skinned	41	57	11	3.97917	2.03678	4.72917	1.4694	1.10417	0.371288	2.14583	0.824868
hałaśliwy	noisy	89	252	9	2.91667	1.26883	6.6875	1.59995	1.875	0.605823	1.58333	0.678965
histeryczny	hysterical	46	195	11	2	0.945313	6.41667	2.06112	1.6875	0.511828	1.89583	0.856504
honorowy	honorable	406	340	8	7.92157	1.26243	5.64706	2.14311	1.2549	0.483452	2.54902	0.6423
impulsywny	impulsive	94	73	10	4.0625	1.2784	6.79167	1.99956	1.33333	0.519137	1.72917	0.764633
ironiczny	ironic	51	425	9	4.95833	1.18426	6	1.84506	1.52083	0.545371	2.08333	0.70961
irytujący	irritating	254	154	9	2.14583	1.28807	5.8125	2.36694	1.64583	0.525502	2.125	0.732963
kapitalny	smashing	74	52	9	7.56863	1.2846	6.31373	1.94412	1.64706	0.844358	1.41176	0.638012
kapryśny	capricious	134	140	8	2.75	0.812142	5.58333	1.87745	1.66667	0.595491	2.14583	0.798658
kłamliwy	mendacious	223	62	8	1.83333	0.952786	6.39583	1.84206	1.20833	0.45934	2.625	0.569621
kłopotliwy	problematic	109	147	10	2.79167	1.28756	4.14583	2.08326	1.72917	0.706793	1.77083	0.660096
kłótliwy	quarrelsome	32	59	8	2.41176	0.962839	6.29412	2.1568	1.33333	0.516398	2.2549	0.744127
kochliwy	amative	10	34	8	4.6875	1.80019	5.9375	1.8726	1.35417	0.601048	2.45833	0.68287
koleżeński	amicable	20	63	10	7.77083	1.17128	5.64583	1.78038	1.16667	0.376622	2.39583	0.535529
kompetentny	competent	99	146	11	8.02083	1.29631	5	2.0525	1.3125	0.551834	1.10417	0.308709
konkretny	specific	342	455	9	7.17647	1.2916	4.80392	2.08825	1.29412	0.460179	1.35294	0.559411
kontaktowy	sociable	80	86	10	7.3125	1.3072	5.3125	1.94779	1.22917	0.472187	1.39583	0.67602
krnąbrny	headstrong	17	60	8	3.375	1.67109	5.77083	1.93775	1.39583	0.573885	2.27083	0.736281
krytyczny	critical	384	330	9	4.66667	1.90557	5.14583	1.76237	1.66667	0.595491	1.8125	0.570787
krzykliwy	gaudy	68	83	9	3.03922	1.37056	6.33333	2.04613	1.47059	0.64352	1.86275	0.748855
kulturalny	polite	123	289	10	7.875	1.08422	4.64583	1.81588	1.41667	0.646869	2.125	0.63998
lekkomyślny	reckless	167	230	11	2.8125	1.16064	5.47917	2.30623	1.47917	0.504852	1.72917	0.573885
lękliwy	apprehensive	6	66	7	2.79167	1.28756	4.4375	2.02018	1.5	0.618853	1.91667	0.70961
lojalny	loyal	658	367	7	8	1.38564	5.5098	1.98366	1.27451	0.532106	2.60784	0.568452
lubieżny	lecherous	37	58	8	4.1875	1.65871	6.27083	1.56748	1.89583	0.691578	2.58333	0.613096
łaskawy	gracious	318	712	7	6.85417	1.16673	5.125	1.52462	1.375	0.489246	2.54167	0.581939
łatwowierny	credulous	59	85	11	2.70833	1.35204	4.125	2.14996	1.25	0.564933	2.10417	0.831292
małostkowy	narrow-minded	52	50	10	3.43137	1.59066	4.21569	1.65304	1.13725	0.400979	2	0.774597
maniakalny	manic	40	34	10	2.9375	1.71856	6.47917	2.03156	1.97917	0.699227	1.9375	0.7553
markotny	sullen	27	122	8	3.0625	1.26165	3.70833	1.86751	2.33333	0.630209	2.08333	0.794485
męczący	tiresome	139	292	7	2.125	0.936835	4.29167	2.27809	1.77083	0.750591	1.91667	0.794485
miłosierny	merciful	276	415	10	7.64706	1.42581	5.62745	1.91792	1.29412	0.460179	2.78431	0.41539
moralny	moral	285	418	7	7.47917	1.66298	5.16667	1.93878	1.20833	0.45934	2.77083	0.472187
mrukliwy	curt	7	56	8	3.1875	1.23178	3.72917	1.5944	1.89583	0.660096	1.91667	0.89522
myślący	thoughtful	101	277	7	7.97917	1.34464	4.8125	2.33981	1.6875	0.58913	1.3125	0.468417
nachalny	obtrusive	53	39	8	2.21569	1.06421	6.31373	2.22252	1.5098	0.612292	2.33333	0.68313
nadąsany	sulky	24	111	8	2.60417	0.961815	4.14583	1.62415	2.6875	0.551834	2.3125	0.829156
nadgorliwy	overzealous	37	37	10	3.6875	1.24039	5.83333	2.02467	1.35417	0.483321	1.66667	0.630209
namiętny	passionate	132	230	8	7	1.27162	7.4375	1.66192	1.97917	0.601048	2.375	0.703336
napalony	horny	535	66	8	5.41176	1.48562	7.86275	1.21687	2.70588	0.460179	2.37255	0.720022
napastliwy	offensive	21	49	10	2.47917	1.6372	6.20833	2.14336	1.85417	0.714279	2.39583	0.67602
napięty	tense	356	484	7	3.125	1.16006	6	2.0525	2.66667	0.519137	1.75	0.757937
napuszony	prideful	44	63	9	2.35417	0.910683	4.35417	1.83917	2.20833	0.742576	2.39583	0.67602
narwany	hot-headed	74	51	7	3.64706	1.30879	6.29412	1.74693	1.70588	0.756151	1.78431	0.75667
natarczywy	pushy	76	260	10	2.58333	1.14545	6.27083	2.00785	1.5625	0.615621	2.10417	0.691578
natchniony	inspired	51	135	10	7.5	1.33687	6.79167	1.79785	2.60417	0.643778	1.625	0.672404
natrętny	bothersome	75	196	8	2.08333	1.31818	5.75	2.11881	1.625	0.63998	2.16667	0.694456
nawiedzony	fanatical	354	168	10	2.58824	1.45844	6.58824	1.90973	1.84314	0.758223	2.19608	0.721654
niechętny	unwilling	74	217	9	3.375	1.29853	3.25	1.95154	2.25	0.699544	2.08333	0.794485
nieczuły	harsh	205	205	8	2.39583	1.08647	5.16667	2.05595	1.4375	0.501328	2.5625	0.615621
niedbały	careless	70	160	8	2.45833	1.32019	3.77083	1.76538	1.33333	0.519137	1.625	0.672404
niedobry	bad	588	411	8	2.23529	0.885172	4.66667	2.2151	1.5098	0.644129	2.4902	0.644129
niedojrzały	immature	139	83	11	3.10417	1.30856	4.25	2.04731	1.58333	0.738985	1.8125	0.641018
niegłupi	clever	50	182	8	6.33333	1.40415	5.33333	1.68009	1.10417	0.371288	1.16667	0.429415
nielojalny	disloyal	33	41	10	1.54167	0.770696	4.3125	2.2612	1.33333	0.595491	2.58333	0.613096
niemiły	unkind	452	339	7	2.56863	1.11812	4.76471	2.03557	1.58824	0.535779	2.43137	0.755113
niemoralny	immoral	53	51	10	2.33333	1.43413	6.10417	1.90453	1.4375	0.615621	2.77083	0.515281
niemrawy	sluggish	7	53	8	2.91667	0.918679	3.27083	1.6978	2.3125	0.748225	1.41667	0.646869
nieomylny	infallible	62	187	9	6.39583	2.06015	4.77083	2.15604	1.125	0.334219	1.22917	0.555038
nieostrożny	heedless	175	260	11	3.09804	0.877608	4.66667	1.94594	1.60784	0.532106	1.37255	0.527666
nieporadny	helpless	25	82	10	2.70833	1.14777	3.8125	1.94232	1.39583	0.494204	1.1875	0.394443
niepoważny	unserious	55	46	10	3.3125	1.3862	5.70833	1.77402	1.6875	0.551834	1.97917	0.601048
niepozorny	inconspicuous	32	258	10	5.0625	1.1743	3.95833	1.97816	1.41667	0.646869	1.60417	0.706793
nierozsądny	unreasonable	67	97	11	2.82353	0.931791	4.72549	1.84476	1.39216	0.493089	1.64706	0.687707
niesforny	unruly	64	105	9	3.5625	1.08972	5.58333	1.93328	1.70833	0.650968	1.95833	0.824062
niestabilny	unstable	275	38	11	2.64583	1.26305	5.625	2.19889	1.89583	0.627036	1.79167	0.617419
niestały	fickle	23	43	8	3.1875	1.31531	3.95833	2.09313	1.5	0.684167	2.16667	0.630209
nieszczery	insincere	49	76	10	1.94118	0.925457	5.45098	2.17544	1.58824	0.605854	2.62745	0.564297
nietaktowny	tactless	37	31	11	2.58333	0.941554	4.66667	1.82574	1.5	0.618853	2.08333	0.70961
nieuczciwy	dishonest	134	95	10	1.89583	1.22456	6.16667	2.10706	1.39583	0.609834	2.58333	0.57735
nieufny	distrustful	61	202	7	3.8125	1.31531	3.875	1.84073	1.45833	0.617419	2.27083	0.706793
nieuprzejmy	impolite	243	129	11	2.52941	0.945578	4.5098	1.73635	1.58824	0.605854	2.52941	0.611652
nieuważny	inattentive	47	55	9	2.83333	1.17298	3.91667	1.83156	1.77083	0.555038	1.41667	0.53924
niewrażliwy	insensitive	57	63	11	3.22917	1.41781	5.125	2.13008	1.39583	0.494204	2.39583	0.67602
niezależny	independent	324	367	10	7.625	1.33089	5.66667	2.44369	1.4375	0.580031	1.64583	0.635462
niezaradny	shiftless	5	34	10	2.43137	0.984985	4.54902	1.84731	1.31373	0.509517	1.13725	0.34754
niezawodny	reliable	203	314	10	7.91667	1.49941	5.66667	1.76651	1.14583	0.412031	1.5625	0.615621
niezdarny	clumsy	211	211	9	2.6875	1.25742	4.58333	2.01941	1.29167	0.45934	1.125	0.334219
niezłomny	steadfast	29	140	9	7.29167	1.83301	5.625	2.04861	1.45833	0.68287	1.97917	0.699227
nieznośny	insufferable	294	682	9	2.05882	0.925457	5.90196	2.05188	1.70588	0.641689	2.27451	0.723282
nieżyczliwy	unhelpful	8	30	11	2.1875	1.06504	4.70833	1.79785	1.52083	0.618495	2.625	0.605823
nikczemny	despicable	132	225	9	2.02083	1.52273	6.29167	2.09313	1.29167	0.503534	2.79167	0.410414
obcesowy	objectionable	19	41	8	3.22917	1.44752	4.35417	2.06789	1.375	0.569621	2.25	0.757937
obiektywny	objective	153	150	10	7.54902	1.2217	4.84314	2.21244	1.33333	0.553775	2.01961	0.677944
obłąkany	insane	426	491	8	2.10417	0.994444	6.22917	2.24309	2.29167	0.742576	2.16667	0.78098
obłudny	hypocritical	31	174	7	2	0.945313	5.75	2.20734	1.3125	0.468417	2.5	0.618853
obowiązkowy	dutiful	59	83	11	7.04167	1.76199	4.5	2.13382	1.22917	0.472187	1.45833	0.617419
obrażony	offended	159	484	8	2.72549	1.13276	5.43137	1.83581	2.80392	0.490698	2.37255	0.720022
obrzydliwy	disgusting	656	565	10	1.64583	1.10106	6.33333	2.24398	1.77083	0.691578	2.0625	0.809682
oburzony	outraged	98	713	8	3.35417	1.36038	6.72917	1.75935	2.89583	0.371288	2.52083	0.651988
ochoczy	willing	11	53	7	6.97917	1.49452	5.60417	1.99723	2	0.71459	1.89583	0.805291
ociężały	sluggish	26	185	8	2.68627	1.02937	3.72549	1.95016	2.33333	0.711805	1.45098	0.701818
oczarowany	charmed	146	274	10	6.6875	1.50398	5.85417	1.78635	2.95833	0.201941	2.45833	0.713348
odporny	resilient	349	272	7	7.33333	1.20872	5.625	2.08974	1.4375	0.54211	1.5	0.545777
odprężony	relaxed	81	216	9	7.60417	1.55385	3.9375	2.38262	2.83333	0.519137	1.95833	0.824062
odpychający	repulsive	84	136	11	1.92157	0.844823	5.82353	2.14202	1.58824	0.605854	2.13725	0.633075
odrażający	repugnant	461	352	10	1.5625	1.08972	6.41667	2.38643	1.75	0.729325	2.08333	0.846352
ofiarny	selfless	57	169	7	5.79167	1.73767	5.70833	1.80965	1.33333	0.519137	2.47917	0.58308
ogłupiały	stupefied	19	257	9	2.39583	1.04657	3.875	2.11001	2.39583	0.764633	1.64583	0.729021
ogłuszony	stunned	62	399	9	2.94118	1.25558	4.70588	2.20267	2.90196	0.412548	1.29412	0.57599
opanowany	poised	278	828	9	7.39583	1.08647	4.08333	2.09186	1.77083	0.515281	1.75	0.635811
opiekuńczy	caring	149	178	10	7.625	1.12278	5.625	1.91994	1.27083	0.449093	2.20833	0.581939
opryskliwy	brusque	38	81	10	1.875	0.890255	4.91667	2.32318	1.5625	0.615621	2.35417	0.729021
ordynarny	coarse	54	155	9	2.33333	1.59583	6.13725	2.27174	1.35294	0.48264	2.37255	0.747283
osamotniony	alone	108	289	11	2.39583	1.12495	4.58333	2.48256	2.45833	0.650968	2.33333	0.78098
osłabiony	weakened	196	530	9	2.75	1.08176	3.70833	2.05207	2.77083	0.515281	1.35417	0.525502
osłupiały	dumbstruck	10	403	9	3.8125	1.29904	4	2.11378	2.89583	0.371288	1.83333	0.833688
osowiały	dejected	15	110	8	3.29412	1.06384	3.78431	1.61634	2.66667	0.588784	1.60784	0.723282
oszczędny	frugal	31	110	9	6.91667	1.54139	4.47917	1.83337	1.1875	0.394443	1.60417	0.643778
ośmielony	encouraged	3	136	9	6.45833	1.32019	6.14583	1.73805	2.77083	0.424744	1.83333	0.724446
ośmieszony	ridiculed	13	35	10	1.8125	1.3785	5.6875	2.51934	2.85417	0.460785	2.29167	0.742576
oświecony	enlightened	70	151	9	7.52941	1.2386	5.82353	1.95659	2.05882	0.645345	1.82353	0.623085
otępiały	muzzy	38	244	8	2.54167	1.23699	3.39583	2.24783	2.64583	0.635462	1.77083	0.831292
ożywiony	animated	55	499	8	6.875	1.34678	6.95833	1.64974	2.75	0.525924	1.77083	0.778421
pasywny	passive	32	33	7	3.72917	1.31666	3.5625	2.02018	1.77083	0.555038	2	0.71459
pedantyczny	pedantic	41	73	11	4.21569	1.46032	4.96078	1.9795	1.09804	0.300327	1.45098	0.6423
perfidny	perfidious	11	74	8	2.16667	1.52054	6.29167	2.03123	1.39583	0.573885	2.4375	0.681246
perwersyjny	perverse	61	45	11	3.5	1.5845	6.4375	1.91196	1.54167	0.581939	2.5625	0.649263
płaczliwy	tearful	18	92	9	2.54167	1.2021	4.5	2.20251	1.47917	0.58308	2.20833	0.797825
płochliwy	jittery	16	41	9	3.19608	0.959575	4.35294	1.87428	1.37255	0.598691	1.56863	0.755113
pobudzony	roused	148	92	9	5.85417	1.4585	6.79167	2.08294	2.83333	0.376622	1.72917	0.818394
pochmurny	gloomy	51	213	9	3.27083	1.04657	3.85417	1.75025	2.39583	0.609834	2.04167	0.797825
podejrzliwy	suspicious	280	417	11	3.70833	1.44338	4.58333	2.11211	1.75	0.564933	2.1875	0.733869
podstępny	cunning	288	270	9	2.72549	1.37227	5.92157	1.89571	1.27451	0.493089	2.31373	0.647771
pogardliwy	scornful	7	204	10	2	1.09155	6.16667	1.88311	1.47917	0.504852	2.54167	0.54415
pogodny	serene	116	1024	7	7.875	0.959277	5.41667	1.78449	1.91667	0.57735	2.10417	0.750591
pojętny	keen	34	58	7	8.0625	0.835547	4.9375	2.42686	1.25	0.483779	1.14583	0.412031
pomocny	helpful	698	387	7	7.82353	1.14378	5.21569	2.01309	1.39216	0.532106	2.05882	0.580061
pomylony	nutty	154	149	8	2.72917	1.34859	5.16667	2.22494	1.875	0.761438	1.97917	0.757644
pomysłowy	inventive	151	155	9	7.89583	0.95069	6.33333	2.07655	1.27083	0.449093	1.14583	0.412031
poniżony	abased	68	100	8	1.39583	0.818394	5.29167	2.6008	2.91667	0.347228	2.52083	0.651988
popędliwy	hotheaded	9	68	9	3.76471	1.22618	6.5098	1.57953	1.45098	0.610368	2.19608	0.693386
porywczy	impetuous	202	191	8	3.9375	1.21	6.625	1.85226	1.5	0.58346	1.89583	0.691578
posępny	somber	97	620	7	3.14583	1.44384	4.1875	2.16997	2.14583	0.714279	2.16667	0.78098
posłuszny	obedient	392	877	9	5.0625	1.97221	4	1.95698	1.60417	0.573885	2.10417	0.592132
postępowy	progressive	32	90	9	7.01961	1.28826	5.56863	1.80283	1.17647	0.47774	1.41176	0.605854
potulny	meek	64	116	7	4.75	1.82768	4	2.43206	1.5625	0.615621	2.25	0.729325
powolny	slow	355	902	7	3.3125	1.3862	3.33333	1.83736	1.64583	0.601048	1.22917	0.515281
pozytywny	positive	510	249	9	8.1875	1.16064	5.54167	2.41413	1.75	0.525924	2.125	0.672404
pracowity	hardworking	325	348	9	8	0.959166	5.72549	1.78973	1.23529	0.428403	1.43137	0.538699
praktyczny	practical	180	352	10	7.14583	1.50162	5.0625	2.1478	1.33333	0.519137	1.25	0.483779
prawdomówny	truthful	41	48	11	8.08333	0.89522	5.47917	1.83337	1.16667	0.376622	2.47917	0.618495
prymitywny	primitive	159	446	10	2.04167	1.35204	4.27083	2.45591	1.27083	0.494204	1.85417	0.618495
przemęczony	overtired	92	100	11	2.62745	1.39944	4.37255	2.23572	2.82353	0.433861	1.37255	0.631214
przemyślny	shrewd	8	101	10	6.875	1.49645	5.10417	1.91566	1.29167	0.581939	1.35417	0.601048
przesądny	superstitious	122	132	9	4	1.47316	4.375	1.93099	1.16667	0.429415	2.1875	0.733869
przezorny	prescient	58	172	9	6.6875	1.41656	3.625	1.99601	1.25	0.564933	1.66667	0.694456
przybity	downcast	233	338	8	2.58824	1.0803	4.39216	2.05989	2.82353	0.433861	2.09804	0.806347
przygaszony	downbeat	4	69	11	3.33333	1.1547	3.29167	1.96738	2.75	0.483779	2.02083	0.887012
przyjazny	friendly	378	528	9	8.0625	0.998003	5.58333	1.91115	1.4375	0.501328	2.47917	0.545371
przymilny	ingratiating	6	79	9	4.6875	1.93683	4.125	1.94198	1.64583	0.729021	2.5625	0.615621
przytępiony	dull	3	34	11	2.82353	1.14378	4.11765	1.81821	2.54902	0.610368	1.58824	0.8044
przyziemny	mundane	25	46	10	5.52083	1.7134	4.125	1.82914	1.33333	0.55862	1.77083	0.721688
przyzwoity	decent	388	530	10	6.91667	1.47076	4.58333	2.11211	1.20833	0.410414	2.41667	0.57735
punktualny	punctual	159	95	10	8.02083	1.13905	4.72917	2.13122	1.29167	0.54415	1.54167	0.650968
pyskaty	lippy	31	40	7	2.39216	1.31268	6.58824	2.05111	1.33333	0.516398	2.39216	0.723282
racjonalny	rational	98	141	10	7.52083	1.27145	5.1875	1.86406	1.39583	0.573885	1.60417	0.609834
radosny	joyful	321	992	7	8.02083	0.999778	6.60417	1.55385	2.14583	0.460785	2.3125	0.689009
raptowny	abrupt	4	78	8	4.5625	1.31935	5.35417	2.14862	1.6875	0.748225	1.97917	0.729021
refleksyjny	thoughtful	6	36	11	6.88235	1.30609	4.58824	1.76835	1.54902	0.540878	2.13725	0.633075
rezolutny	resolute	6	32	9	7.3125	1.50398	5.83333	1.62864	1.22917	0.424744	1.45833	0.650968
romantyczny	romantic	785	325	11	7.02083	1.36038	6.60417	2.02894	1.4375	0.501328	2.35417	0.757644
rozbawiony	amused	44	712	10	7.56863	1.10009	6.21569	1.95257	2.82353	0.433861	2.01961	0.836426
rozbity	ailing	333	487	7	2.10417	1.13437	4.54167	2.4053	2.79167	0.45934	2.33333	0.753244
rozbudzony	awake	30	190	10	6.25	1.26323	6.25	2.1388	2.91667	0.347228	1.5625	0.796435
rozchwiany	wavering	21	32	10	2.91667	1.12672	5.27083	2.18057	2.4375	0.615621	1.91667	0.678965
rozdarty	conflicted	168	284	8	3.14583	1.16673	5.3125	2.17487	2.75	0.483779	2.5625	0.681246
rozdygotany	edgy	1	141	11	2.98039	1.22458	6	2.21811	2.82353	0.433861	1.80392	0.825097
rozespany	wakened	4	63	9	3.72917	1.28394	2.9375	2.0773	2.85417	0.460785	1.5625	0.822716
roześmiany	smiley	9	130	10	7.72917	1.18033	6.97917	1.74416	2.625	0.569621	2.14583	0.824868
rozeźlony	upset	2	92	9	2.5	1.5845	5.9375	2.40926	2.75	0.525924	2.27083	0.736281
rozgadany	loquacious	12	31	9	5.21569	1.47396	5.43137	1.96219	1.82353	0.654397	1.56863	0.608437
rozgarnięty	discerning	50	87	11	7.22917	1.15297	5.02083	1.74416	1.22917	0.472187	1.22917	0.424744
rozgniewany	angered	202	32	11	2.77083	1.32472	6.625	1.59287	2.89583	0.424744	2.33333	0.78098
rozjuszony	enraged	15	167	10	2.875	1.17826	6.89583	1.74111	2.75	0.635811	2.33333	0.85883
rozkochany	enamored	7	63	10	6.80392	1.35676	6.88235	1.73951	2.78431	0.46103	2.47059	0.808775
rozkoszny	adorable	94	252	9	6.97917	1.50869	5.75	2.07826	1.875	0.732963	2.20833	0.849489
rozlazły	languid	17	52	8	2.54167	1.051	3.66667	2.20573	1.75	0.729325	1.35417	0.668106
rozluźniony	loose	46	183	11	7.04167	1.25407	3.77083	2.30854	2.79167	0.45934	1.89583	0.805291
rozmarzony	dreamy	11	168	10	5.98039	1.48983	4.56863	2.10955	2.43137	0.538699	1.90196	0.806347
rozmowny	talkative	216	250	8	6.6875	1.20559	5.45833	2.35163	1.625	0.605823	1.54167	0.68287
rozpustny	wanton	19	48	9	2.64583	1.31262	6.02083	2.0472	1.47917	0.618495	2.64583	0.56454
rozradowany	gleeful	12	168	11	8.02083	1.31262	6.70833	1.97816	2.6875	0.657405	2.27083	0.818394
rozrywkowy	fun-loving	96	70	10	6.60784	1.37227	6.72549	1.58844	1.33333	0.588784	2	0.824621
rozrzutny	wasteful	51	58	9	2.9375	1.15604	5.45833	1.86751	1.3125	0.551834	1.83333	0.78098
roztropny	prudent	36	230	9	7.33333	1.40415	4.91667	1.79637	1.125	0.334219	1.83333	0.724446
rozumny	sapient	38	339	7	7.9375	1.11863	4.60417	2.47317	1.20833	0.503534	1.3125	0.468417
rozważny	deliberate	75	132	8	7.41176	1.16921	4.76471	1.68034	1.29412	0.540152	1.72549	0.665686
rozżalony	resentful	22	120	9	2.79167	1.16616	4.85417	2.05239	2.875	0.392754	2.33333	0.833688
rubaszny	ribald	6	87	8	4.39583	1.49808	6.625	1.65831	1.58333	0.646869	2.35417	0.668106
ruchliwy	brisk	41	312	8	5.91667	1.23484	5.60417	2.26668	1.83333	0.724446	1.52083	0.683843
rycerski	chivalrous	90	312	8	7.54902	1.17156	5.98039	2.05417	1.27451	0.493089	2.2549	0.594748
rzeczowy	matter-of-fact	141	345	8	6.9375	1.50752	4.60417	1.95415	1.16667	0.476393	1.27083	0.573885
rzetelny	reliable	39	112	8	7.79167	1.12908	5.08333	2.02992	1.20833	0.410414	1.45833	0.54415
samodzielny	self-reliant	89	144	11	7.95833	1.41359	4.83333	2.38197	1.27083	0.535529	1.22917	0.424744
samolubny	selfish	623	92	9	2.31373	1.30369	5.72549	1.95016	1.19608	0.400979	2.5098	0.612292
sceptyczny	skeptical	98	119	10	5.08333	1.59565	4.77083	1.99189	1.6875	0.748225	1.91667	0.646869
schludny	neat	53	190	8	7.27083	1.26726	4.1875	1.95324	1.58333	0.646869	1.5625	0.615621
sensowny	sensible	70	579	8	7.25	1.42172	3.95833	1.97816	1.52083	0.683843	1.4375	0.580031
serdeczny	cordial	107	648	9	7.78431	1.10116	4.96078	1.8543	1.33333	0.476095	2.60784	0.634931
skołowany	dazed	173	101	9	3.3125	1.0946	4.22917	1.7165	2.8125	0.532207	1.875	0.866025
skrupulatny	scrupulous	79	104	11	7.22917	1.18931	4.5625	1.9008	1.20833	0.45934	1.375	0.489246
skrzywdzony	hurt	116	74	11	2.04167	1.70054	5.20833	2.28742	2.77083	0.515281	2.66667	0.663111
skupiony	focused	375	477	8	7.21569	1.28552	4.54902	2.09106	2.56863	0.574627	1.15686	0.36729
solidny	solid	307	710	7	7.77083	1.32472	5.0625	2.08751	1.25	0.483779	1.35417	0.525502
spanikowany	panicky	35	57	11	2.6875	1.33936	7.20833	1.89016	2.8125	0.445127	1.60417	0.643778
spełniony	fulfilled	105	108	9	7.79167	1.64974	5.375	2.24675	2.58333	0.646869	2.0625	0.598091
speszony	abashed	15	414	8	3.84314	1.04638	4.56863	1.93137	2.7451	0.560112	1.86275	0.80049
sprośny	bawdy	124	35	7	3.54167	1.72538	6.25	1.92961	1.60417	0.706793	2.60417	0.573885
stanowczy	resolute	219	539	9	6.47917	1.12967	5.75	1.6948	1.35417	0.483321	1.60417	0.609834
staranny	meticulous	20	98	8	7.83333	1.03827	4.14583	2.23121	1.3125	0.58913	1.52083	0.58308
stateczny	stolid	16	114	9	5.58824	1.35907	3.27451	1.70972	1.56863	0.670967	1.88235	0.711254
sterany	weary	7	43	7	3.27083	1.44015	4.08333	1.73614	2.45833	0.797825	1.70833	0.824062
stęskniony	longing	11	62	10	4.77083	1.69153	5.83333	2.13714	2.77083	0.515281	2.39583	0.79197
stoicki	stoic	15	38	7	6.47917	1.47301	3.1875	2.02806	1.75	0.668437	2.04167	0.713348
strachliwy	fearful	55	34	10	2.76471	1.0879	5.21569	2.11956	1.31373	0.547364	1.72549	0.695081
strapiony	crestfallen	24	192	9	3.02083	1.13905	3.77083	1.90453	2.8125	0.490603	2.39583	0.706793
strudzony	fatigued	10	68	9	3.77083	1.34068	3.83333	1.86037	2.72917	0.535529	1.375	0.63998
stuknięty	mental	598	233	9	2.85417	1.73805	5.41667	2.30479	1.4375	0.615621	1.9375	0.696687
subtelny	subtle	222	358	8	7.15686	1.27079	4.78431	2.06217	1.29412	0.540152	1.80392	0.748855
sumienny	conscientious	60	109	8	7.85417	1.36817	4.97917	1.9623	1.1875	0.445127	1.58333	0.646869
swawolny	dissolute	8	52	8	4.60417	1.48381	5.60417	1.88769	1.64583	0.601048	2.22917	0.721688
swobodny	casual	113	483	8	6.79167	1.33621	4.8125	2.23755	2.0625	0.665447	1.97917	0.635462
sympatyczny	amiable	290	729	11	7.76471	1.30519	4.84314	2.25719	1.15686	0.36729	2.37255	0.691687
szarmancki	gallant	56	51	10	7.02083	1.57763	5.97917	1.70718	1.35417	0.601048	2.10417	0.750591
szczodry	generous	131	83	8	7.4375	1.2867	4.60417	1.86501	1.27083	0.535529	2.45833	0.770696
szorstki	abrasive	211	646	8	2.75	1.08176	4.77083	2.02369	1.625	0.605823	2.41667	0.678965
taktowny	tactful	47	83	8	7.23529	1.47768	4.47059	2.02339	1.19608	0.44809	1.94118	0.704607
tchórzliwy	cowardly	216	173	10	2.8125	1.48261	4.95833	2.03123	1.45833	0.581939	1.89583	0.750591
tęskniący	longing	8	33	9	4.70833	1.30398	5.83333	2.05595	2.64583	0.601048	2.45833	0.770696
towarzyski	sociable	247	247	10	7.95833	0.898186	5.27083	2.18057	1.3125	0.511828	1.9375	0.696687
triumfujący	triumphant	7	99	11	6.75	1.65671	6.60417	1.73499	2.75	0.525924	1.64583	0.699227
troskliwy	considerate	222	138	9	7.94118	0.925457	5.52941	1.77034	1.35294	0.559411	2.23529	0.650791
twórczy	creative	148	239	7	8.14583	1.03121	6.83333	1.77852	1.45833	0.503534	1.25	0.437595
ubawiony	amused	3	247	8	7.20833	1.14777	5.95833	1.98889	2.83333	0.519137	2.25	0.862949
uciążliwy	cumbersome	72	127	9	2.21569	1.39016	5.62745	1.94896	1.7451	0.658578	1.92157	0.658578
ucieszony	happy	17	222	9	7.8125	1.17882	6.41667	1.66098	2.77083	0.555038	2.35417	0.811869
uczuciowy	emotional	139	133	9	6.66667	1.20872	6.22917	1.99189	1.41667	0.53924	2.47917	0.618495
uczynny	obliging	42	108	7	8.02083	1.10106	4.35417	2.10864	1.20833	0.45934	2.27083	0.736281
udręczony	harrowed	21	220	9	2.01961	1.04862	5.70588	2.0129	2.54902	0.610368	2.21569	0.72976
uduchowiony	spiritual	45	32	11	6.0625	1.53548	4.02083	1.83917	1.875	0.732963	2.64583	0.668106
ujmujący	charming	28	119	8	7.10417	1.56068	6.08333	1.76048	1.625	0.703336	1.77083	0.778421
układny	affable	9	71	7	5.89583	1.81295	3.89583	2.17568	1.20833	0.45934	1.66667	0.694456
umęczony	agonized	18	96	8	2.60784	1.04074	5.11765	2.14147	2.82353	0.433861	1.35294	0.594089
uniżony	humble	52	75	7	3.3125	1.84686	4.5	2.26913	2.22917	0.805291	2.33333	0.724446
upokorzony	humiliated	181	261	10	1.875	1.04423	6.89583	2.26199	2.85417	0.412031	2.47917	0.618495
uprzedzony	prejudiced	108	186	10	2.60417	1.26726	4.60417	2.17079	2.0625	0.7553	2.6875	0.468417
uradowany	joyous	82	700	9	7.86275	1.0774	6.27451	1.86632	2.84314	0.463575	2.27451	0.826521
urzekający	captivating	21	43	10	7.27083	1.41029	5.89583	1.89332	1.75	0.729325	1.89583	0.831292
uskrzydlony	inspired	8	55	11	7.79167	1.28756	6.95833	1.80965	2.72917	0.535529	1.9375	0.7553
uspokojony	calmed	16	470	10	7.35417	1.10106	3.6875	2.27994	2.66667	0.595491	2.04167	0.797825
ustępliwy	ductile	6	33	9	4.19608	1.44249	4.03922	1.64877	1.21569	0.41539	2.01961	0.706829
utrudzony	fatigued	5	40	9	2.89583	1.13437	3.45833	1.85608	2.60417	0.67602	1.47917	0.683843
uzdolniony	gifted	91	109	10	8.33333	0.907025	6	1.82185	1.125	0.334219	1.1875	0.445127
waleczny	valiant	128	241	8	7.70833	1.2021	6.97917	1.65657	1.52083	0.651988	1.97917	0.785225
wartościowy	valuable	183	98	11	8.2549	0.95589	5.84314	1.95318	1.27451	0.493089	2.23529	0.619298
wiarygodny	trustworthy	240	119	10	7.9375	1.0191	5.5625	2.10275	1.47917	0.683843	2.0625	0.632666
wnikliwy	astute	31	47	8	6.6875	1.27423	5.04167	1.87887	1.4375	0.580031	1.375	0.489246
wojowniczy	belligerent	41	135	10	6.70833	1.52927	6.85417	1.76237	1.4375	0.615621	1.9375	0.598091
wpływowy	influential	145	104	8	6.58824	1.61464	5.94118	1.74828	1.35294	0.594089	1.35294	0.559411
wrzaskliwy	raucous	9	46	10	2.5	1.48754	6.91667	1.85465	1.58333	0.613096	1.91667	0.794485
wstrętny	odious	485	618	8	1.45833	0.713348	6.97917	2.07815	1.77083	0.750591	2.625	0.530957
wstydliwy	coy	103	107	9	3.97917	1.31262	3.91667	1.77252	1.4375	0.580031	2.35417	0.729021
wścibski	prying	214	145	8	2.07843	0.976589	6.41176	2.02165	1.27451	0.532106	2.45098	0.672718
wulgarny	vulgar	135	131	8	1.89583	1.05668	6.64583	2.05757	1.47917	0.58308	2.625	0.489246
wybredny	picky	168	106	8	3.5625	1.08972	4.83333	1.61553	1.27083	0.449093	2.02083	0.729021
wybuchowy	short-tempered	395	327	9	3.47917	1.33671	6.91667	1.95517	1.41667	0.646869	2.125	0.788886
wycieńczony	exhausted	56	185	11	2.39216	1.28185	5.13725	2.49816	2.90196	0.360827	1.33333	0.553775
wyciszony	tranquil	42	43	9	5.35417	1.48022	2.91667	1.74835	2.45833	0.617419	2	0.771845
wycofany	withdrawn	61	37	8	3.08333	1.10768	4.5	2.12383	1.79167	0.617419	1.72917	0.609834
wygadany	voluble	94	61	8	6.35417	1.50869	5.60417	2.07046	1.25	0.525924	1.47917	0.714279
wygodny	comfortable	292	494	7	5.21569	1.80348	4.19608	1.77786	1.41176	0.638012	1.72549	0.723282
wykończony	worn out	575	338	10	2.5625	1.1468	3.9375	2.4703	2.8125	0.490603	1.52083	0.771558
wylewny	effusive	29	75	7	4.875	1.29853	4.97917	2.1585	1.66667	0.55862	2.16667	0.753244
wymęczony	spent	16	40	9	2.6875	1.51806	3.35417	2.36544	2.79167	0.54415	1.83333	0.833688
wyniosły	haughty	96	465	8	3.27451	1.38677	5.4902	2.01368	1.27451	0.493089	2.29412	0.701259
wyobcowany	alienated	36	46	10	2.79167	1.09074	4.20833	1.96738	2.125	0.761438	1.95833	0.713348
wypalony	burnt out	100	197	8	2.20833	1.11008	4.5625	2.43124	2.58333	0.57735	1.35417	0.525502
wypoczęty	rested	87	231	9	7.77083	1.60106	4.14583	2.7981	2.79167	0.581939	1.45833	0.68287
wyrachowany	calculating	48	74	11	3.19608	1.76657	6.03922	1.94896	1.17647	0.433861	2.2549	0.744127
wyrozumiały	understanding	210	207	11	7.52083	1.28807	4.27083	1.81881	1.22917	0.424744	2.14583	0.824868
wyspany	wakeful	15	36	7	7.66667	1.27719	5.20833	2.30594	2.9375	0.244623	1.29167	0.54415
występny	debased	12	37	8	3.25	1.49467	4.58333	2.12216	1.52083	0.74347	2.4375	0.711793
wystraszony	frightened	330	631	11	2.86275	0.938501	5.43137	2.08091	2.78431	0.502543	1.94118	0.810229
wytrwały	tenacious	89	150	8	7.83333	1.11724	6.0625	2.02544	1.39583	0.573885	1.47917	0.58308
wytrzymały	enduring	175	337	10	7.85417	0.98908	5.85417	1.89051	1.39583	0.494204	1.52083	0.58308
wyzwolony	liberated	63	157	9	6.6875	1.5866	6.29167	1.93466	2.10417	0.750591	2.375	0.63998
wzburzony	indignant	144	820	9	3.41176	1.04262	6.5098	2.00372	2.84314	0.463575	2.07843	0.770536
wzmocniony	reinforced	56	237	10	7.1875	1.12337	5.70833	2.10327	2.58333	0.646869	1.75	0.785507
wzruszony	moved	261	950	9	6.77083	1.18931	6.58333	1.85465	2.89583	0.308709	2.5625	0.769256
zaaferowany	involved	11	125	11	4.77083	1.6789	5.6875	2.25177	2.70833	0.581939	2.125	0.732963
zabobonny	superstitious	5	74	9	3.01961	1.56831	4.76471	2.24132	1.09804	0.300327	2.37255	0.691687
zaborczy	possessive	71	36	8	2.35417	1.27979	6.0625	2.29158	1.33333	0.519137	2.35417	0.699227
zachłanny	avid	90	85	9	2.64583	1.24609	5.29167	1.73767	1.41667	0.57735	2.45833	0.650968
zaciekły	fierce	35	93	8	5.47917	1.55727	6.33333	2.01413	1.60417	0.535529	1.9375	0.598091
zacofany	backward	53	56	8	2.43137	1.20424	4.72549	2.05989	1.54902	0.72976	1.43137	0.608437
zadufany	conceited	89	51	8	2.45833	1.03056	4.85417	1.935	1.45833	0.617419	2.45833	0.68287
zadumany	pensive	16	255	8	5.39583	1.10588	3.52083	1.73805	2.625	0.530957	1.77083	0.721688
zadurzony	smitten	42	29	9	5.08333	1.76048	5.58333	2.11211	2.85417	0.460785	2.45833	0.770696
zadziwiony	mystified	20	81	10	5.27451	0.939754	5.35294	1.80913	2.94118	0.310597	1.58824	0.753033
zafrasowany	troubled	4	138	11	3.70833	1.27092	4.39583	1.64691	2.66667	0.630209	2.04167	0.849489
zagniewany	angered	19	199	10	3.04167	1.21967	5.9375	1.76739	2.91667	0.27931	2.4375	0.741082
zakłamany	mendacious	55	42	9	1.60417	1.28394	5.10417	2.5031	1.4375	0.615621	2.72917	0.449093
zalękniony	anxious	1	93	10	2.47059	1.08357	5.4902	2.1389	2.43137	0.640466	1.86275	0.721654
załamany	distraught	341	319	8	2.22917	0.994444	5	2.17334	2.875	0.443631	2.125	0.841099
zamroczony	dazed	41	186	10	3.25	1.10126	4.5625	2.06188	2.79167	0.503534	1.6875	0.748225
zapalczywy	fervent	22	92	10	4.83333	1.44889	5.66667	2.09694	1.375	0.569621	1.97917	0.785225
zapalony	ignited	62	141	8	6.29412	1.31597	6.56863	2.11901	2.45098	0.672718	1.43137	0.574627
zapiekły	fiery	4	85	8	3.83333	1.40415	5.60417	2.08071	1.77083	0.691578	2.125	0.732963
zapłakany	tearful	27	64	9	2.625	1.19618	6.25	2.00531	2.97917	0.144338	2.39583	0.818394
zaradny	resourceful	59	47	7	8.08333	1.23484	5.5	2.27848	1.27083	0.535529	1.3125	0.58913
zarozumiały	conceited	260	258	11	2.47059	1.17223	5.68627	1.80544	1.21569	0.41539	2.17647	0.712906
zasępiony	morose	4	161	9	3.14583	1.16673	3.60417	1.79526	2.625	0.63998	2.08333	0.846352
zaspany	sleepy	22	275	7	3.54167	1.35204	2.95833	1.61058	2.77083	0.555038	1.22917	0.515281
zaślepiony	blinded	116	129	10	2.6875	1.44629	4.33333	2.10706	2.5625	0.681246	2.04167	0.770696
zatrwożony	afraid	2	92	10	2.92157	1.26243	5.41176	2.12769	2.76471	0.472789	2.13725	0.80049
zauroczony	captivated	93	82	10	6.70833	1.66258	6.22917	1.99189	2.85417	0.412031	2.4375	0.796435
zawadiacki	pert	5	45	10	5.41667	1.25195	6.29167	1.41359	1.60417	0.706793	2.14583	0.798658
zawiedziony	disappointed	470	486	11	2.33333	1.29374	3.97917	2.1585	2.8125	0.570787	2.33333	0.78098
zawistny	envious	15	47	8	1.80392	1.00039	6.58824	1.94089	1.19608	0.400979	2.70588	0.460179
zażenowany	embarrassed	193	370	10	3.125	1.52462	5.39583	2.13122	2.85417	0.460785	2.5625	0.711793
zboczony	deviant	295	35	8	2.9375	1.49334	7.125	1.9529	1.33333	0.519137	2.70833	0.503534
zdołowany	depressed	132	3	9	1.91667	0.963887	3.47917	2.36993	2.6875	0.657405	2.29167	0.824062
zdrożony	weary	2	34	8	3.4902	1.37655	4.78431	1.96279	2.11765	0.863645	1.94118	0.810229
zdruzgotany	devastated	210	186	11	1.9375	0.976451	5.66667	2.19606	2.875	0.443631	2.1875	0.891001
zgorszony	appalled	6	165	9	2.8125	1.36298	5.70833	1.99956	2.875	0.443631	2.75	0.564933
zgorzkniały	bitter	157	145	11	1.97917	0.999778	4.20833	2.39644	1.625	0.605823	2.47917	0.74347
zgryźliwy	acerbic	42	87	9	2.33333	0.886942	5.64706	1.9882	1.56863	0.608437	2.37255	0.720022
zirytowany	irritated	63	737	10	2.5	0.87519	6.14583	1.92398	2.79167	0.54415	2.14583	0.850271
złośliwy	malicious	447	875	8	2.33333	1.32622	6.3125	1.81197	1.60417	0.535529	2.5625	0.615621
zmarnowany	wasted	120	101	10	2.20833	1.0097	3.66667	2.05595	2.60417	0.643778	1.875	0.761438
zmartwiony	worried	928	633	10	3.76471	1.28978	5	1.86548	2.86275	0.400979	2.13725	0.825097
zmordowany	ragged	11	109	10	2.5	1.11087	4.4375	2.26825	2.85417	0.460785	1.5625	0.822716
zmożony	worn out	3	35	7	4	1.30466	3.85417	1.935	2.60417	0.643778	1.54167	0.742576
zniechęcony	discouraged	38	343	11	2.79167	1.0097	3.39583	1.75935	2.72917	0.573885	1.95833	0.770696
znudzony	bored	431	556	8	3.21569	1.18851	3.41176	1.61464	2.72549	0.493089	1.60784	0.776619
znużony	weary	62	810	7	3.08333	1.30194	2.39583	1.33272	2.8125	0.532207	1.72917	0.868836
zraniony	hurt	563	342	8	2.20833	1.28756	6.60417	1.95415	2.85417	0.412031	2.5625	0.711793
zrozpaczony	heartbroken	142	740	11	1.95833	1.16616	5.54167	2.59261	2.8125	0.532207	2.39583	0.736281
zrujnowany	ruined	241	278	10	1.88235	1.03242	5.98039	2.30209	2.64706	0.62685	1.68627	0.647771
zrzędliwy	grouchy	88	22	9	2.25	1.21165	5.02083	2.07815	1.5	0.545777	2.1875	0.733869
zszokowany	shocked	253	138	10	4.35417	1.12021	6.72917	1.74721	2.875	0.392754	2.0625	0.782964
życzliwy	kind	163	432	8	8.25	0.978492	4.375	2.23726	1.3125	0.511828	2.54167	0.54415
żywiołowy	vigorous	17	56	9	6.7451	1.09258	7.01961	1.78315	1.39216	0.568452	1.64706	0.62685
